# Supplementary material for: Relationship between sodium–glucose cotransporter-2 inhibitors and muscle atrophy in patients with type 2 diabetes mellitus: a systematic review and meta-analysis
Source: Frontiers journal article supplement (doi:10.3389/fendo.2023.1220516), 2023-09-15
Supplement: Data_Sheet_2.pdf [file Data_Sheet_2.pdf]

## Supplementary Material 2-Subgroup analysis

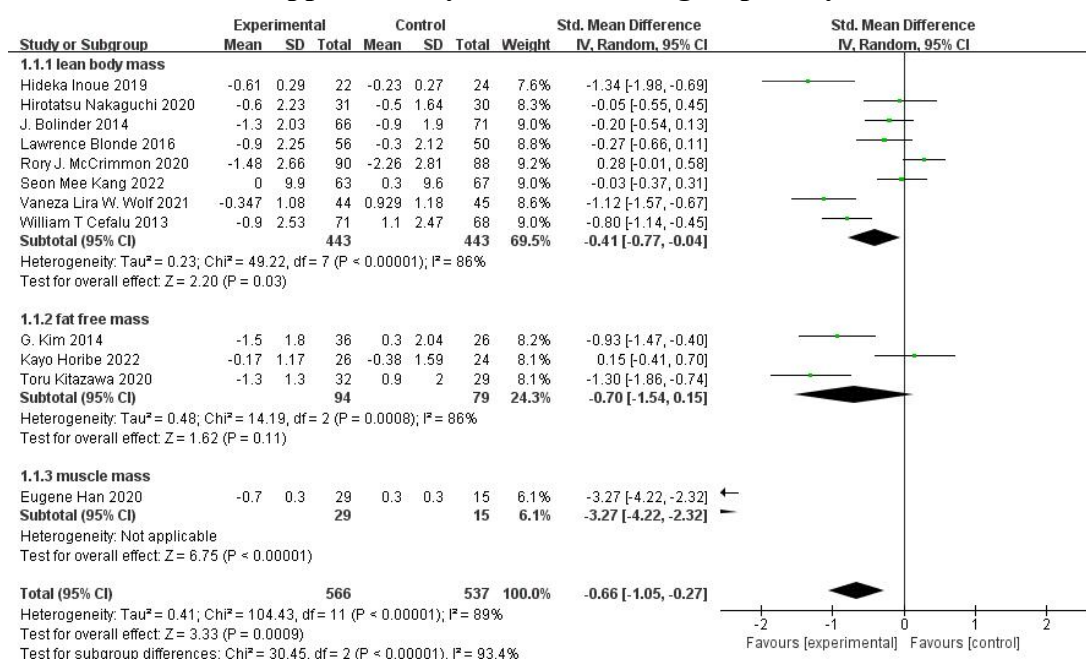

**Figure 1.** Subgroup analysis of changes in lean body mass between the SGLT-2i group and the control group - muscle definition

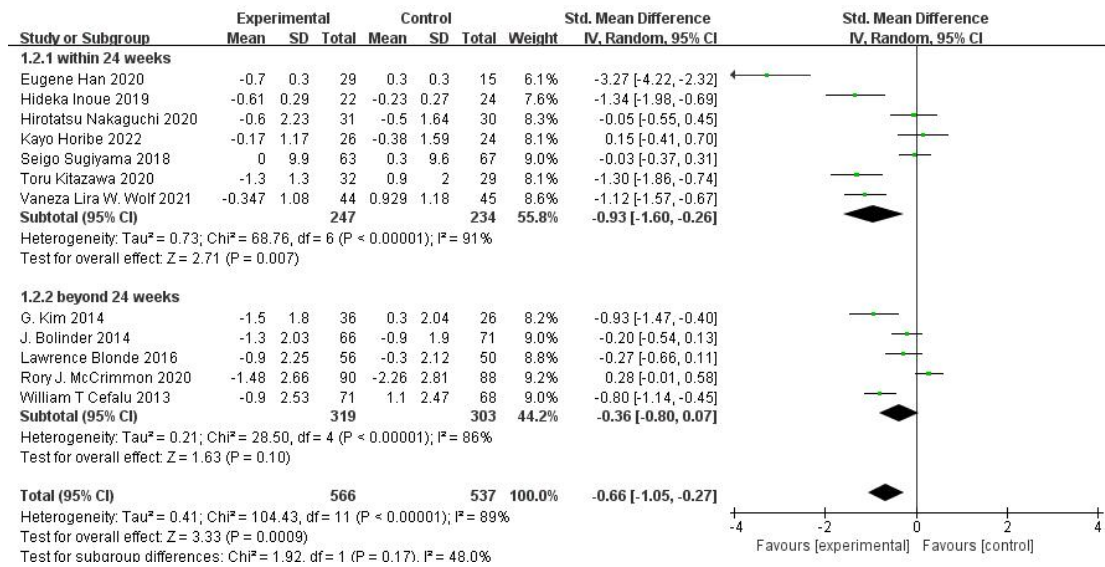

**Figure 2.** Subgroup analysis of changes in lean body mass between the SGLT-2i group and the control group - treatment duration

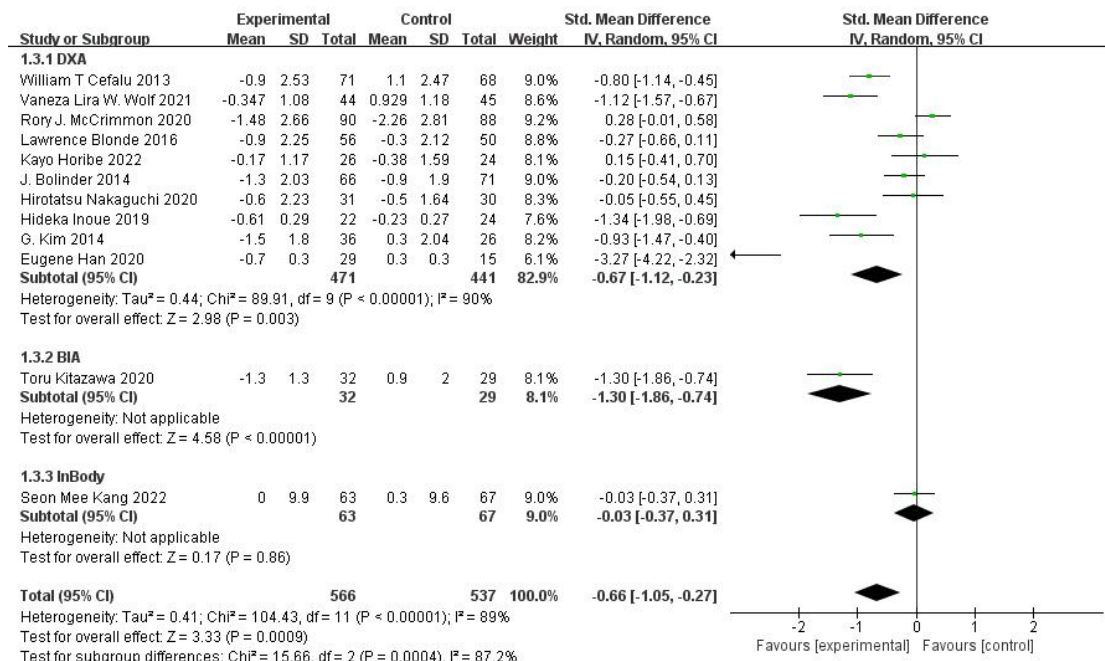

**Figure 3.** Subgroup analysis of changes in lean body mass between the SGLT-2i group and the control group - measurement method

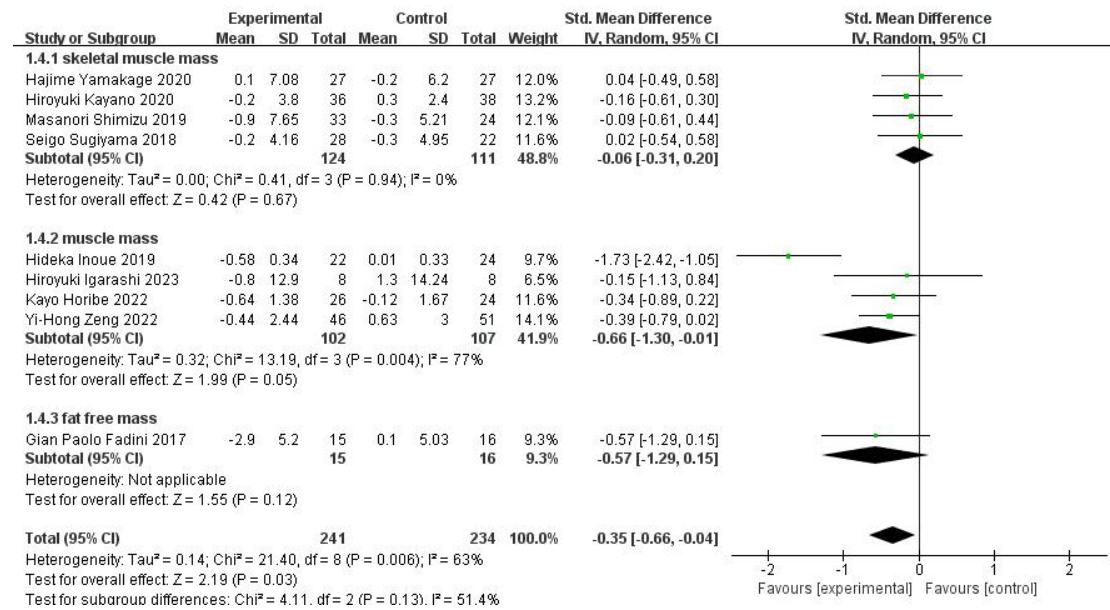

**Figure 4.** Subgroup analysis of changes in skeletal muscle mass between the SGLT-2i group and the control group - muscle definition

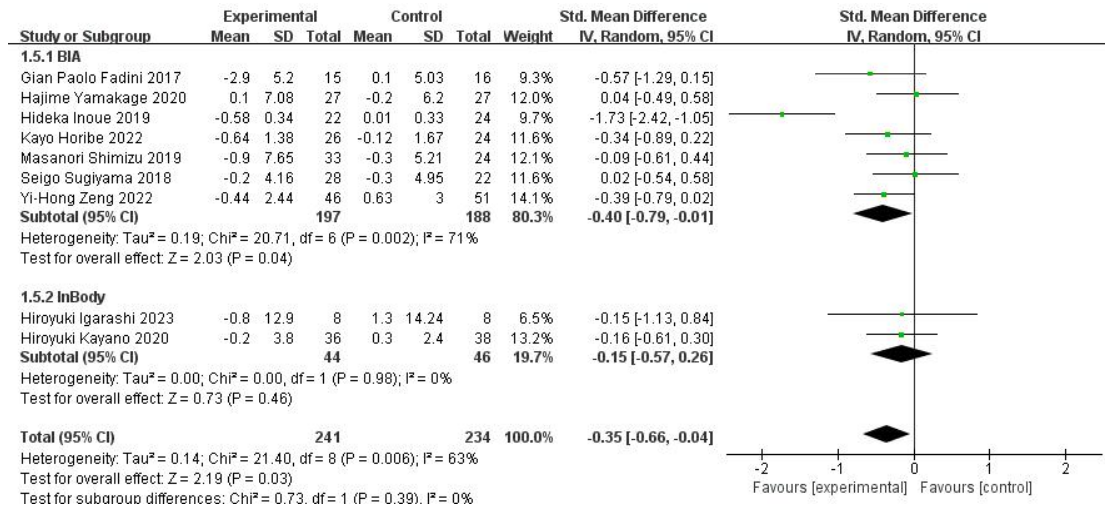

**Figure 5.** Subgroup analysis of changes in skeletal muscle mass between the SGLT-2i group and the control group - measurement method
